# Supplementary material
Source: PubMed Central journal article supplement (PMC4333609)
Supplement: Supp_Data.pdf [file Supp_Data.pdf]

## Supplementary Data

### Supplementary Materials and Methods

Mouse embryonic stem cell line D3 (ES-D3; ATTC, Manassas, VA) was maintained in a feeder-free culture system on 0.1% gelatin-coated (Millipore, Billerica, MA) tissue culture-treated plastic in Dulbecco's modified Eagle

medium consisting of 4.5 g/L glucose (Invitrogen, Carlsbad, CA) and supplemented with 10% fetal bovine serum (Biowest, Kansas city, MO), 50 IU/mL penicillin and 50 µg/mL streptomycin (Cellgro, Manassas, VA), 2 mM L-glutamine (Invitrogen), 1,000 U/mL ESGRO<sup>®</sup> mouse LIF (Millipore), and 0.1 mM B-mercaptoethanol (Invitrogen).
