# Supplementary material
Source: PubMed Central journal article supplement (PMC4333609)
Supplement: Supp_Fig1.pdf [file Supp_Fig1.pdf]

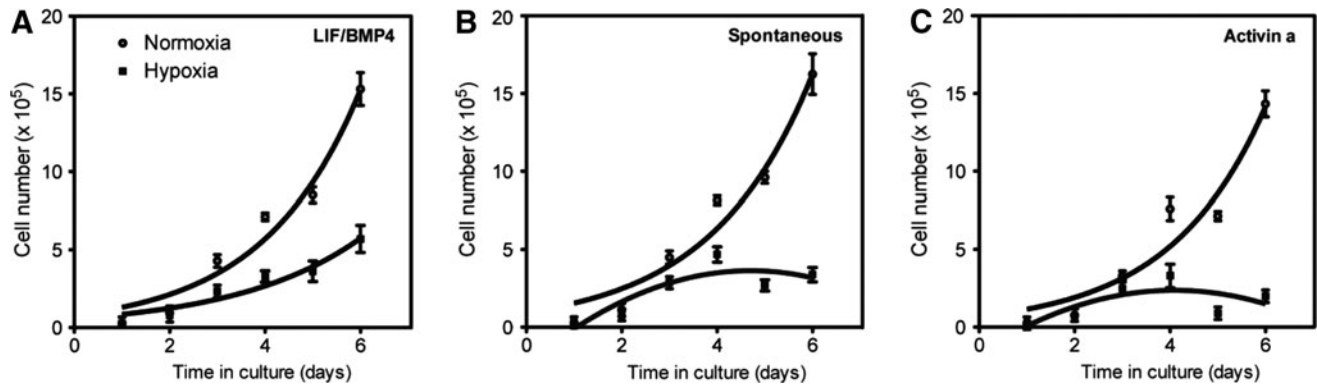

**SUPPLEMENTARY FIG. S1.** Proliferation kinetics of mouse embryonic stem cells (mESCs) under hypoxic and normoxic conditions. The cells were cultured in six-well plates under 21% O<sub>2</sub> (normoxia, *circles*) or 1% O<sub>2</sub> (hypoxia, *squares*) conditions treated with the maintenance media (**A**), spontaneous (SP) differentiation media (**B**), or 20 ng/mL activin A (AA) (**C**). At the indicated time points, three wells of each experimental group were taken for counting. The data are presented as averaged cell numbers per well [mean ± standard error of the mean (SEM)] of two independent experiments performed in triplicates ( $n=6$ ).
