# Supplementary material
Source: PubMed Central journal article supplement (PMC4333609)
Supplement: Supp_Fig2.pdf [file Supp_Fig2.pdf]

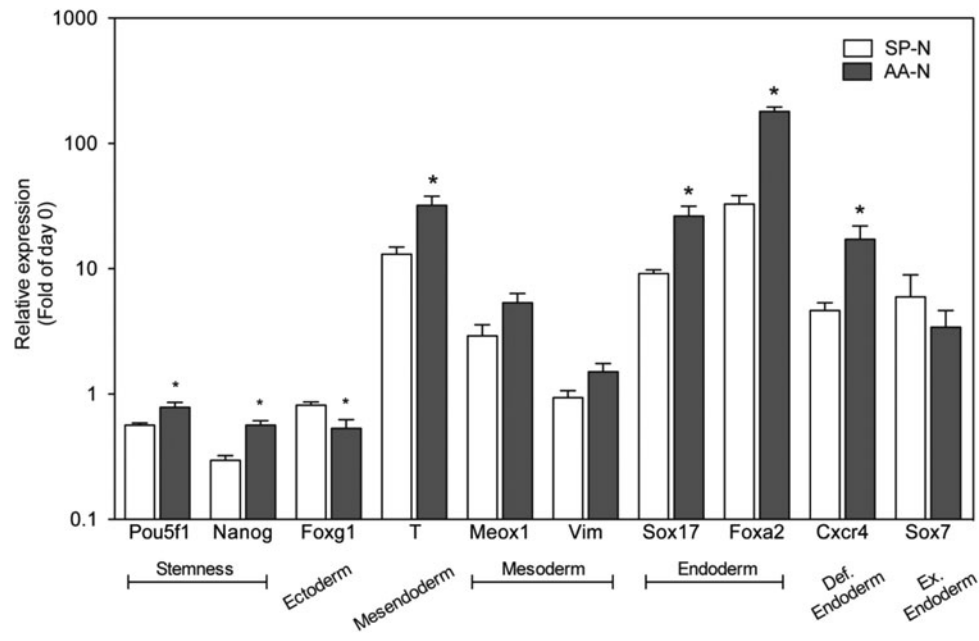

**SUPPLEMENTARY FIG. S2.** Marker genes expression profile of mESCs differentiating under normoxia. mESCs were cultured for 6 days in the SP media or 20 ng/mL AA-containing media under normoxia (21% O<sub>2</sub>). The relative expression of marker genes was measured using quantitative polymerase chain reaction (qPCR) and is presented as fold of day 0 (mean ± SEM, *n* = 7–9, \**P* < 0.05 AA-N vs. SP-N).
