# Supplementary material
Source: PubMed Central journal article supplement (PMC4333609)
Supplement: Supp_Table1.pdf [file Supp_Table1.pdf]

SUPPLEMENTARY TABLE S1. LIST OF TAQMAN  
INVENTORIED PRIMERS AND PROBES ACQUIRED  
FROM APPLIED BIOSYSTEMS

---

| <i>Gene symbol</i> | <i>Assay ID</i> |
|--------------------|-----------------|
| <i>Pou5f1</i>      | Mm03053917_g1   |
| <i>Nanog</i>       | Mm02019550_s1   |
| <i>Foxa2</i>       | Mm00839704_mH   |
| <i>Sox17</i>       | Mm00488363_m1   |
| <i>Cxcr4</i>       | Mm01996749_s1   |
| <i>Sox7</i>        | Mm00776876_m1   |
| <i>Foxg1</i>       | Mm02059886_s1   |
| <i>Brachyury T</i> | Mm01318252_m1   |
| <i>Meox1</i>       | Mm00440285_m1   |
| <i>Vim</i>         | Mm01333430_m1   |
| <i>Sftpc</i>       | Mm00488144_m1   |
| <i>Aqp5</i>        | Mm00437579_m1   |
| <i>Scgb1a1</i>     | Mm00442046_m1   |
| <i>Ppla</i>        | Mm02342430_g1   |

---
